# Supplementary material
Source: PubMed Central journal article supplement (PMC3928177)
Supplement: epi-9-142-s01.pdf [file epi-9-142-s01.pdf]

## **Supplemental Material to:**

**Ludivine Doridot, Dorothée Houry, Harald Gaillard, Sonia T  
Chelbi, Sandrine Barboux, and Daniel Vaiman**

**miR-34a expression, epigenetic regulation, and function  
in human placental diseases**

**Epigenetics 2013; 9(1)**

**<http://dx.doi.org/10.4161/epi.26196>**

**[www.landesbioscience.com/journals/epigenetics/article/26196](http://www.landesbioscience.com/journals/epigenetics/article/26196)**

Supplementary Figure 1 (Doridot et al)

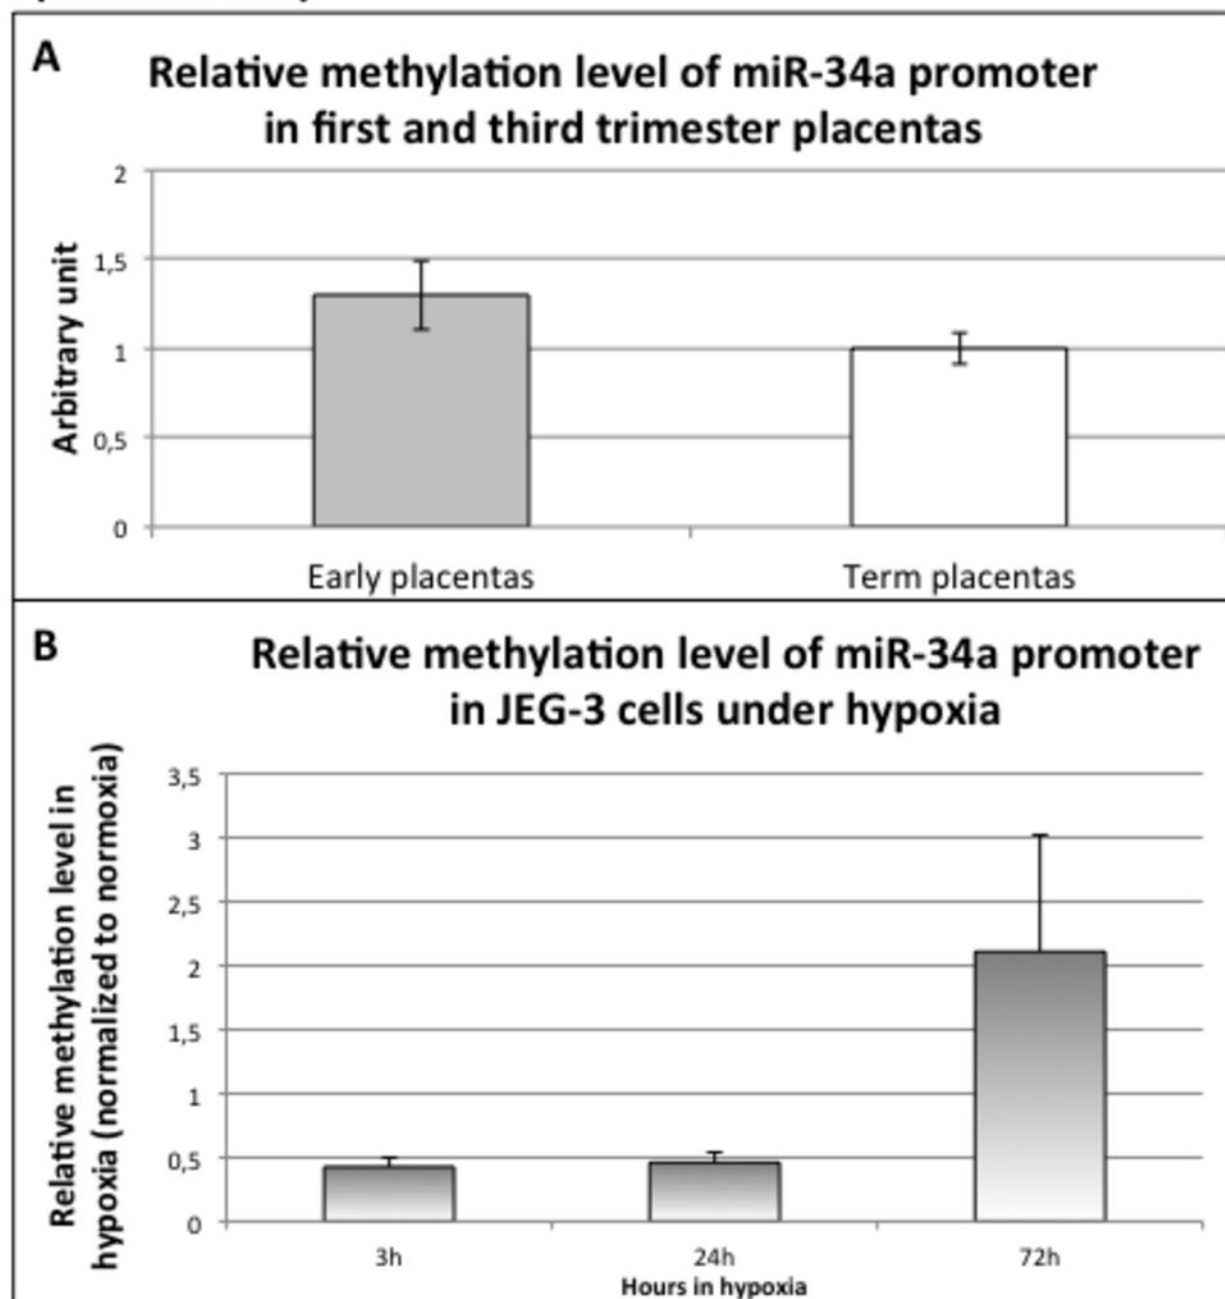

**Supplementary Figure 1.** miR-34a promoter methylation in early placenta and cells submitted to 3, 24 or 72h of hypoxia. (A) Methylation was assessed by XbaI plus or minus HpaII digestion followed by quantitative PCR in 8 term control placentas (Term placentas), and 8 placentas from first trimester of pregnancy (Early placentas). The Ct values of each sample digested by XbaI and HpaII were normalized by those obtained for XbaI digested DNA. The methylation level obtained for the control placentas was arbitrary set to one. (B) Methylation was assessed by XbaI plus or minus HpaII digestion followed by quantitative PCR in cells submitted to 3, 24 and 72h of hypoxia (2% O<sub>2</sub>) or under classical normoxic culture condition (20% O<sub>2</sub>). The Ct values of each sample digested by XbaI and HpaII were normalized by those obtained for XbaI digested DNA. The methylation level obtained for the control placentas was arbitrary set to one. The graphical representation shows the relative expression in hypoxia compared to normoxia.

Supp Table 1

| Name                                                                    | Forward                                                                                                         | Reverse                                          |
|-------------------------------------------------------------------------|-----------------------------------------------------------------------------------------------------------------|--------------------------------------------------|
| SDHA                                                                    | TACAAGGTGCGGATTGATGA                                                                                            | CAAAGGGCTTCTTCTGTTGC                             |
| Cyclophilin A                                                           | GTCAACCCACCGTGTCTT                                                                                              | CTGCTGTCTTTGGAACCTTGT                            |
| 5S RNA                                                                  | GCCATACCACCTGAACG                                                                                               | TATTCCCAGGCGGTCTCC                               |
| Universal primer<br>for reverse transcription<br>after poly adenylation | CGAATTCTAGAGCTCGAGGCAGGCGACATGGCTGGCTAGTTAAGCTTGGTACCGAGCTCGGA<br>TCCACTAGTCCTTTTTTTTTTTTTTTTTTTTTTTTTTTTTTTTTV |                                                  |
| Pri-mir34                                                               | TTTAAGCTTATGCGCCCTGCC                                                                                           | TTTCTCGAGAGAGCTTCCGAAGTCCTGG                     |
| Genomic mir34a<br>(for cloning)                                         | AAGGTGGTGGTCTGGCTATG                                                                                            | CCAGGACTCCACGTTCATCT                             |
| Mir34a Promoter                                                         | CACGAGCAGGAAGGAGGAC                                                                                             | GAGCAGGTAGTGCAGGCTTC                             |
| Mature mir-34a                                                          | TGGCAGTGTCTTAGCTGGTTGT                                                                                          | CGAATTC TAGAGCTCGAGGCAGG                         |
| P53                                                                     | CCCAAGCAATGGATGATTTGA                                                                                           | GGCATTCTGGGAGCTTCATCT                            |
| BCL2                                                                    | CCCAAGCAATGGATGATTTGA                                                                                           | GGCATTCTGGGAGCTTCATCT                            |
| SERPINA3                                                                | AGCAGTGGGGCTCTCAGTAA                                                                                            | ATAAGCAGACAGGGCCACAC                             |
| SERPINA3 3'UTR<br>(for cloning)                                         | TGAGTGTGGTGGtctaga<br>TGGAGACAAGGACCATTGTGCGTTTC                                                                | TGAGTGTGGTGGtctaga<br>GTCCAACGAAATTATTTATTGCTGTC |
